# Supplementary material
Source: publisher site journal article supplement (https://www.dovepress.com/article/268269)
Supplement: Supplementary file 1 [file get_supplementary_file.php]

ORIGINAL RESEARCH

Hamed K et al

# No evidence for ceftobiprole-induced immune hemolytic anemia in three Phase 3 clinical trials

Kamal Hamed1, Tatiana Wiktorowicz1, Maziar Assadi Gehr1

**Supplementary materials**

**Supplementary Table 1**. Ethics Committees/Institutional Review Boards for BPR-PIP-002, TARGET, and ERADICATE trials

| **BPR-PIP-002** | |
| --- | --- |
| Bulgaria | Ethics Committee for Clinical Trials, Sofia, Bulgaria |
| Georgia | Amtel Hospital First Clinical LLC, Tbilisi, Georgia |
| JSC Evex Hospitals, Tbilisi, Georgia |
| LTD High Technology Medical Center University Clinic, Tbilisi, Georgia |
| LTD Tbilisi Pediatric Private Clinic, Tbilisi |
| M. Iashvili Children's Central Hospital, Tbilisi, Georgia |
| Tbilisi State Medical University G. Zhvania Pediatric Academic Clinic, Tbilisi, Georgia |
| Hungary | MRC-ECCP, Budapest, Hungary |
| Romania | National Bioethics Committee for Medicines and Medical Devices |
| **TARGET** | |
| Bulgaria | Ethics Committee for Multicentre Trials IRB #1, Sofia, Bulgaria |
| Hungary | Medical Research Council of Hungary, Budapest, Hungary |
| Szegedi Tudomanyegyetem Szent-Gyorgyi Albert Orvos IRB #1, Szeged, Hungary |
| Ukraine | Ethics Committee within the Regional Clinical Hospital, Ivano-Frankivsk, Ukraine |
| Ethics Committee within Ivano-Frankivsk City Clinical Hospital #1, Ivano-Frankivsk, Ukraine |
| Ethics Committee within Lviv Regional Clinical Hospital, Lviv, Ukraine |
| Ethics Committee within the Public Institution Central District Hospital under Zhytomyr District Council, Zhytomyr Region, Ukraine |
| Ethics Committee within Kyiv City Clinical Hospital #4, Kyiv, Ukraine |
| Ethics Committee within the Public Institution: Zaporizhia City Clinical Hospital of Urgent and Emergency Medical Care, Zaporizhia, Ukraine |
| Ethics Committee within the Public Institution Dnipropetrovsk I.I. Mechnykov Regional Clinical Hospital, Dnipro, Ukraine |
| Ethics Committee within the Central City Clinical Hospital, Uzhhorod, Ukraine |
| Ethics Committee within the Public City Clinical Hospital of Emergency Medical Care, Lviv, Ukraine |
| Ethics Committee within Vinnytsia M.I. Pyrohov Regional Clinical Hospital, Vinnytsia, Ukraine |
| USA | Schulman Associates IRB Inc., Cincinnati, OH, USA |
| Sharp Healthcare IRB, San Diego, CA, USA |
| Sunrise Health Institutional Review Board, Las Vegas, NV, USA |
| **ERADICATE** | |
| Argentina | Comite Etica del Instituto Medico Platense, Buenos Aires, Argentina |
| Sanatorio Mayo Privado S.A. IRB #1 – Etical, Córdoba, Argentina |
| Comité Institucional de Ética en Investigación en Salud del Hospital Italiano de Córdoba, Córdoba, Argentina |
| CIEIS del Niño y del Adulto – Polo Hospitalario, Córdoba, Argentina |
| Hospital Rawson IRB #1 – Hospital Rawson, Córdoba, Argentina |
| Cieis del Adulto Hospital Cordoba IRB #1, Córdoba, Argentina |
| Comité de Ética de la Investigación Institucional – HIGA Prof. Dr. Ramón Carrillo de Ciudadela, Buenos Aires, Argentina |
| EC Sanatorio Britanico SA IRB #1 – Comité de Ética del Sanatorioa Britanico SA, Rosario, Argentina |
| Comite Etica en Investigacion Hospital Dr. Jose Maria Cullen, Santa Fe, Argentina |
| Brazil | Santa Casa de Misericordia de Belo Horizonte IRB, Belo Horizonte, Brazil |
| Hospital Ernesto Dornelles IRB, Porto Alegre, Brazil |
| Faculdade de Medicina de são José do Rio Preto IRB, Sao Jose do Rio Preto, Brazil |
| Secretaria de Estado da Saúde / Hospital do Trabalhador IRB, Curitiba, Brazil |
| Bulgaria | ECCT, Sofia, Bulgaria |
| Georgia | National Center of Therapy IRB #1, Tbilisi, Georgia |
| LTD #5 Clinical Hospital IRB #1, Tbilisi, Georgia |
| Institute of Cardiology IRB #1, Tbilisi, Georgia |
| JSC Rustavi Central Hospital IRB #1, Tbilisi, Georgia |
| Ltd "Academician Vakhtang Bochorishvili Clinic" IRB #1, Tbilisi, Georgia |
| LTD Central University Clinic After Academic N. Kipshidze IRB #1, Tbilisi, Georgia |
| LTD Acad. O. Gudushauri National Medical Center IRB #1, Tbilisi, Georgia |
| Germany | Ethikkommission an der Universitätsmedizin Greifswald, Institut für Pharmakologie, Greifswald, Germany |
| Ethikkommission an der Universität Regensburg, Dienstgebäude "Altes Finanzamt", Regensburg, Germany |
| Ethik-Kommission der Medizinischen Fakultät der Christian-Albrechts-Universität zu Kiel, Kiel, Germany |
| Israel | Helsinki Committee of Bnai Zion Medical Center, Haifa, Israel |
| Helsinki Committee of Sheba Medical Center, Tel Ha’shomer, Israel |
| Helsinki Committee of Sieff Medical Center, Safed, Israel |
| Helsinki Committee of Tel Aviv Sourasky Medical Center, Tel Aviv, Israel |
| Helsinki Committee of Baruch Padeh Medical Center M.P., The Lower Galilee, Israel |
| Italy | Ethics Committee of Bergamo, Bergamo, Italy |
| Ethics Committee Milano Area 2, Milan, Italy |
| Ethics Committee Unico Regionale, Trieste, Italy |
| Ethics Committee Brianza, Monza, Italy |
| Ethics Committee of Area Vasta Emilia Nord, Modena, Italy |
| Independent Ethics Committee of Area Vasta Emilia Centro, Bologna, Italy |
| Russia | City Hospital #33 of Leninsky District of Nizhny Novgorod IRB #1, Nizhny Novgorod, Russia |
| Ethics Committee within Federal State Budget Institution “Central Clinical Hospital with Polyclinic” under the Presidential Executive Office of Russian Federation, Moscow, Russia |
| Moscow City Independent Ethics Committee (within State Government-Financed Institution of Moscow "Scientific-Practical Center of Clinical Research and Medical Technology Expertise within Moscow Department of Healthcare"), Moscow, Russia |
| Local Ethics Committee within State Government-Financed Healthcare Institution of Stavropol Krai: Pyatigorsk City Clinical Hospital, Pyatigorsk, Russia |
| Non-state Health Care Inst Road Clinical Hosp of 'Russian Railway' JSC IRB #1, Saint Petersburg, Russia |
| Yaroslavl Regional Clinical Hospital IRB #1, Yaroslavl, Russia |
| Municipal Hlth Care Inst City Hosp #2 Krasnodar Multifield Clinicodiagnostic Assoc IRB #1, Krasnodar, Russia |
| St. Joseph Belgorod Regional Clinical Hospital IRB #1, Belgorod, Russia |
| State Budgetary Healthcare Institution: V.V. Vinogradov City Clinical Hospital under Moscow Department of Healthcare IRB #1 – Moscow City Independent Ethics Committee, Moscow, Russia |
| Spain | CEIm Hospital Universitario la Paz, Madrid, Spain |
| Ukraine | Local Ethic Committee of City Hospital #3, Zaporizhia, Ukraine |
| Local Ethic Committee of Dnipropetrovsk City Multispecialty Clinical Hospital #4, Dnipro, Ukraine |
| Local Ethic Committee of Dnipropetrovsk I.I. Mechnykov Regional Clinical Hospital, Dnipro, Ukraine |
| Local Ethic Committee of Regional Clinical Hospital, Ivano-Frankivsk, Ukraine |
| Local Ethic Committee of Public Non-Profit Enterprise O.O. Shalimov City Clinical Hospital #2 under Kharkiv City Council, Kharkiv, Ukraine |
| "Local Ethic Committee of V.T. Zaitsev Institute of General and Emergency Surgery, Kharkiv, Ukraine |
| Local Ethic Committee of Communal Noncommercial Enterprise of Lviv Regional Council "Lviv Regional Clinical Hospital", Lviv, Ukraine |
| USA | Sharp Healthcare IRB, San Diego, CA, USA |
| Advarra IRB, Columbia, MD, USA |
| Western Institutional Review Board, Puyallup, WA, USA |
| South Africa | Pharma-Ethics Research Ethics Committee IRB, South Africa |
